# Supplementary material for: In-hospital electrical muscle stimulation for patients early after heart failure decompensation: results from a prospective randomised controlled pilot trial
Source: PubMed Central journal article supplement — Open Heart. 2022 Jul 11;9(2):e001965. doi: 10.1136/openhrt-2022-001965 (PMC9274513; doi:10.1136/openhrt-2022-001965), 2022-07-11
Supplement: openhrt-2022-001965supp001.pdf [file openhrt-2022-001965supp001.pdf]

## Supplement 1

| EMS regimen:                                           | <i>effective EMS</i> |                  | <i>sham procedure</i> |                  |
|--------------------------------------------------------|----------------------|------------------|-----------------------|------------------|
| Time of sessions, min                                  | 58.7±18.6            |                  | 54.5±10.4             |                  |
| Number of sessions                                     | 8.8±2.9              |                  | 8.0±2.0               |                  |
| Intensity                                              | Maximum tolerated    |                  | Minimal               |                  |
| <i>Magnitude of the impulse</i><br><i>M ± σ, Volts</i> | <i>Surface:</i>      |                  |                       |                  |
|                                                        | <i>Anterior</i>      | <i>Posterior</i> | <i>Anterior</i>       | <i>Posterior</i> |
| Right thigh                                            | 23,36±2,54           | 23,63±2,25       | 5,66±1,45             | 5,43±1,47        |
| Left thigh                                             | 23,45±2,38           | 23,63±2,29       | 5,74±1,63             | 5,61±1,41        |
| Right calf                                             | 21,36±3,83           | 21,27±3,47       | 6,09±1,24             | 5,96±1,22        |
| Left calf                                              | 21,23±3,85           | 21,27±3,32       | 5,96±1,26             | 5,83±1,23        |

EMS regimen protocol for effective EMS and sham procedures

*Refers to manuscript : In-hospital electrical muscle stimulation for patients early after heart failure decompensation : results from a prospective randomized controlled pilot trial*
